# Supplementary material
Source: Research Square preprint supplement (doi:10.21203/rs.3.rs-8257259/v1)
Supplement: Supplementary file 1 [file 51853e05a8ff21c623865b19.docx]

**Supplementary material**

**Technical Cleanliness analysis by Pyr-GC/MS method- performance study**

Maroš Špirko[a](#_top),[*](#_top), Kenichi Obayashi[b](#_top), Katsuhiro Nakagawa[c](#_top), Kazumi Kawahara[d](#_top), Alexander Kaszonyi[e](#_top), Lívia Izsák[e](#_top)

a Environmental Quality Group, Panasonic Industrial Devices Slovakia s.r.o, Továrenská 13, 064 01 Stará Ľubovňa, Slovakia
b Mass Spectrometry Business Unit, Analytical and Measuring Instruments Division, Shimadzu Corporation, 1 Nishinokyo Kuwabara-cho, Nakagyo-ku, Kyoto 604-8511, Japan
c RoHS Testing Laboratory, Research Centre, Shimadzu General Service, Inc., 1 Nishinokyo Tokudaiji-cho, Nakagyo-ku, Kyoto 604-8445, Japan
d Green Solution Unit, Solutions COE, Analytical and Measuring Instruments Division, Shimadzu Corporation, 1 Nishinokyo Kuwabara-cho, Nakagyo-ku, Kyoto 604-8511, Japan
e Department of Organic Technology, Catalysis and Petroleum Chemistry, Faculty of Chemical and Food Technology, Slovak University of Technology in Bratislava, Bratislava I, 812 37 Bratislava, Slovakia

**Figure 1. TIC and SIM(m/z=128) pyrogram of 10 ng PVC**

**Figure 2. MS spectrum of the pyrolyzed PVC sample at the maximum of SIM pyrogram
 (molecular ion of naphthalene (M+) is at m/z=128)**

**Table 1. S/N ratio of *m/z*=128 for PVC injections**

| **Meas. Amount** | **1** | **2** | **3** | **4** | **5** |
| --- | --- | --- | --- | --- | --- |
| **10.0 ng** | 40.00 | 34.97 | 46.65 | 40.56 | 34.62 |
| **1.0 ng** | 19.11 | 19.34 | 15.95 | 21.21 | 21.60 |
| **0.5 ng** | 10.98 | 12.63 | 9.38 | 12.29 | 10.43 |

**Figure 3. SIM of *m/z*=128 for 10.0 ng PVC injections**

**Figure 4. SIM of *m/z*=128 for 1.0 ng PVC injections**

**Figure 5. SIM of *m/z*=128 for 0.5 ng PVC injections**

* Corresponding author.
*E-mail addresses*: [maros.spirko@eu.panasonic.com](mailto:maros.spirko@eu.panasonic.com), [maros.spirko.work@gmail.com](mailto:maros.spirko.work@gmail.com)
